# Supplementary figures and images for: C-terminal threonines and serines play distinct roles in the desensitization of rhodopsin, a G protein-coupled receptor
Source: eLife journal article supplement (doi:10.7554/elife.05981), 2015-04-24

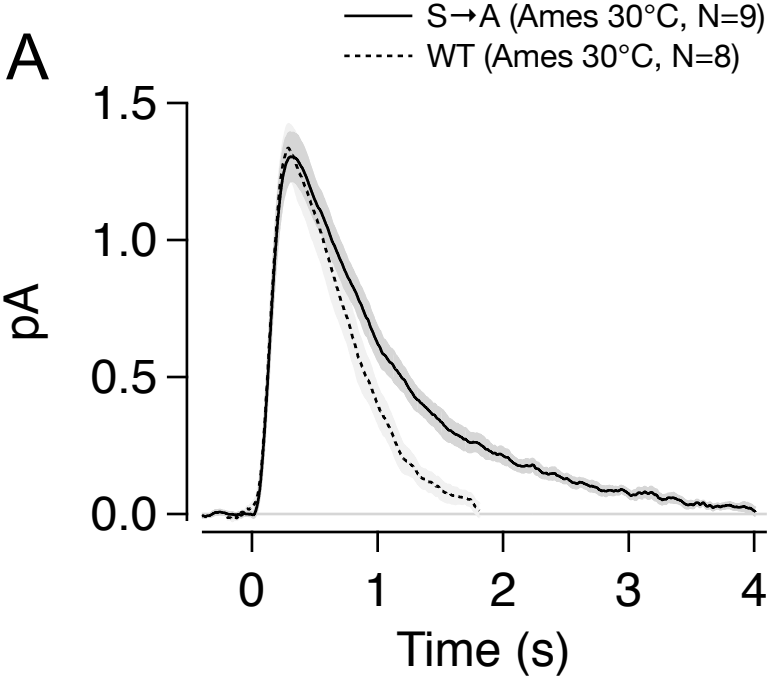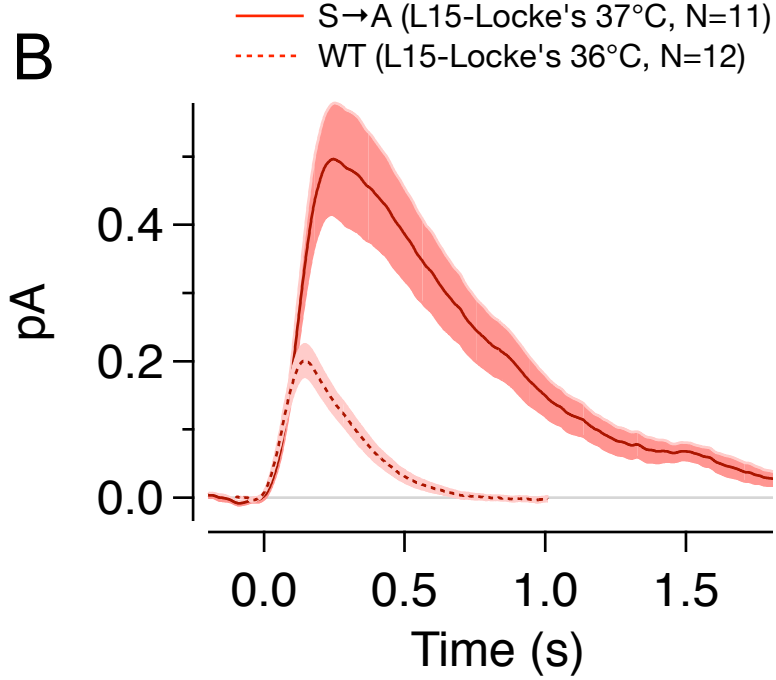

Supplement: supp [file elife-05981-supp-v1.zip]

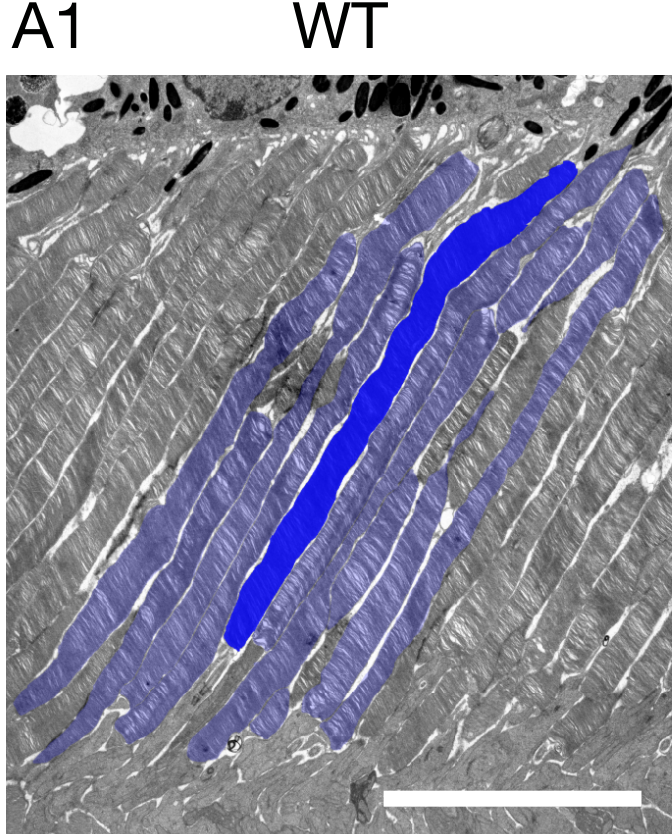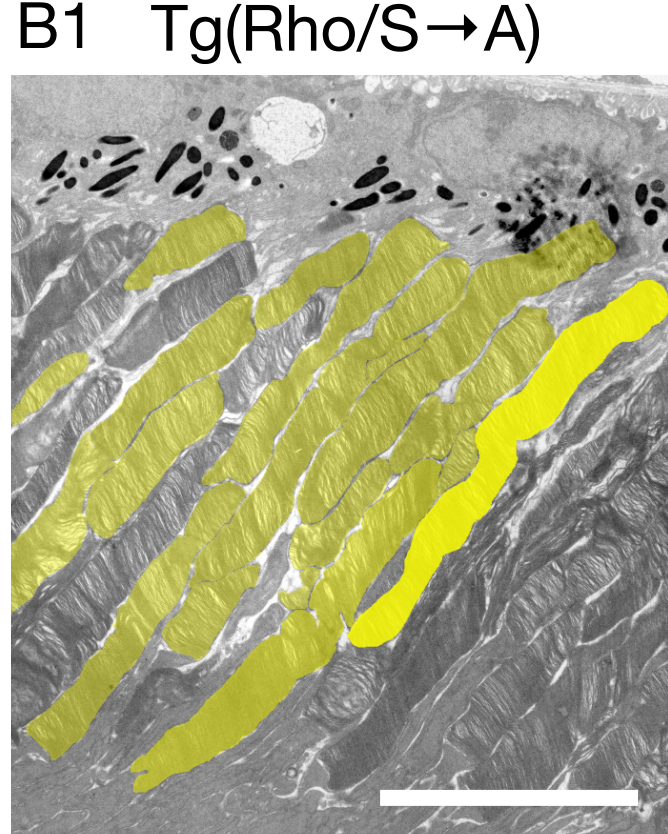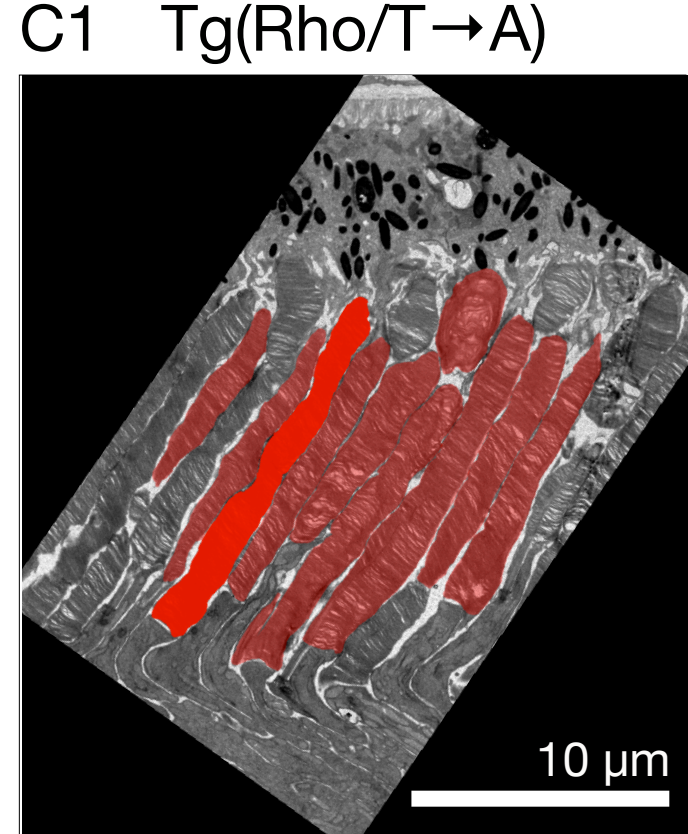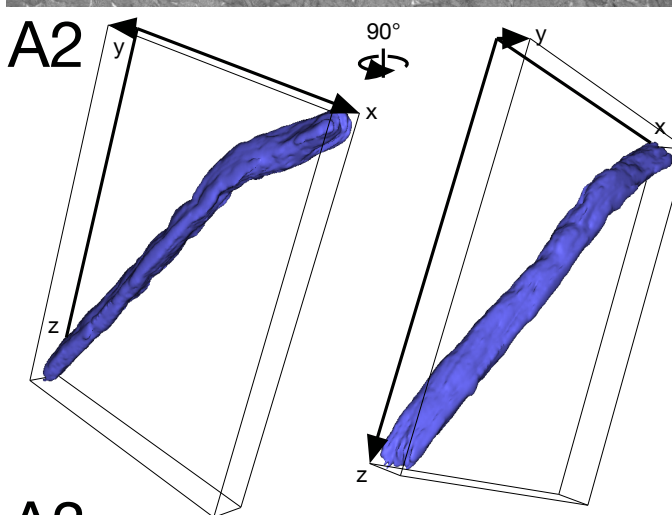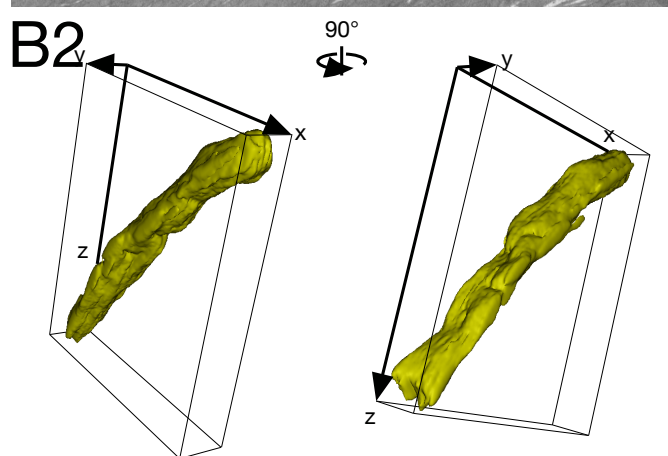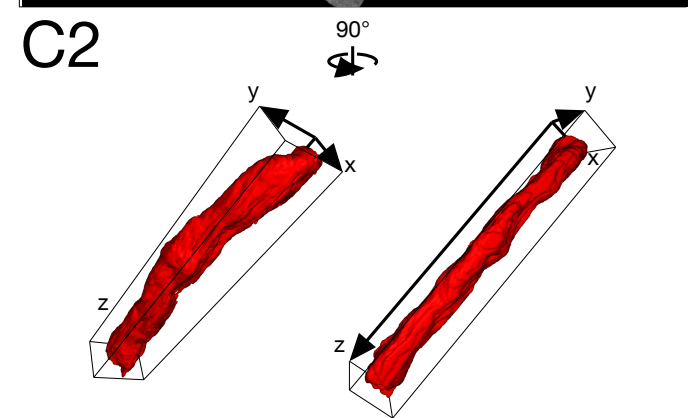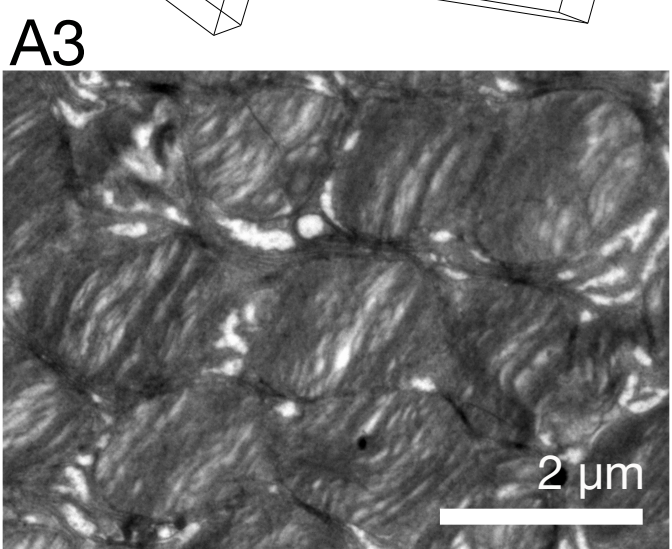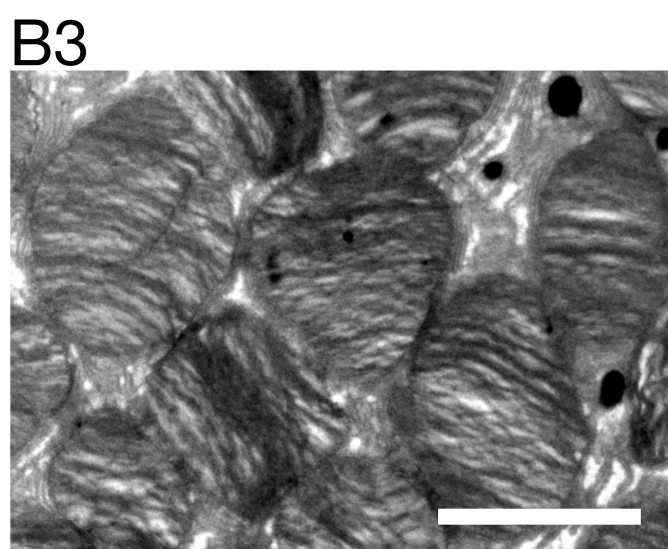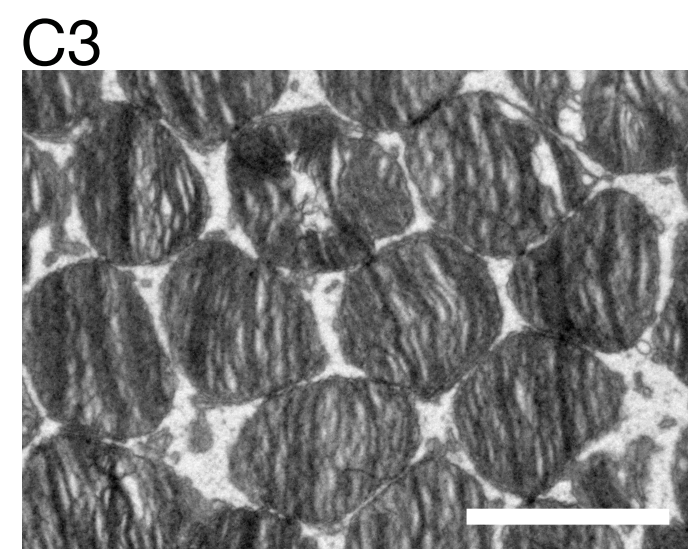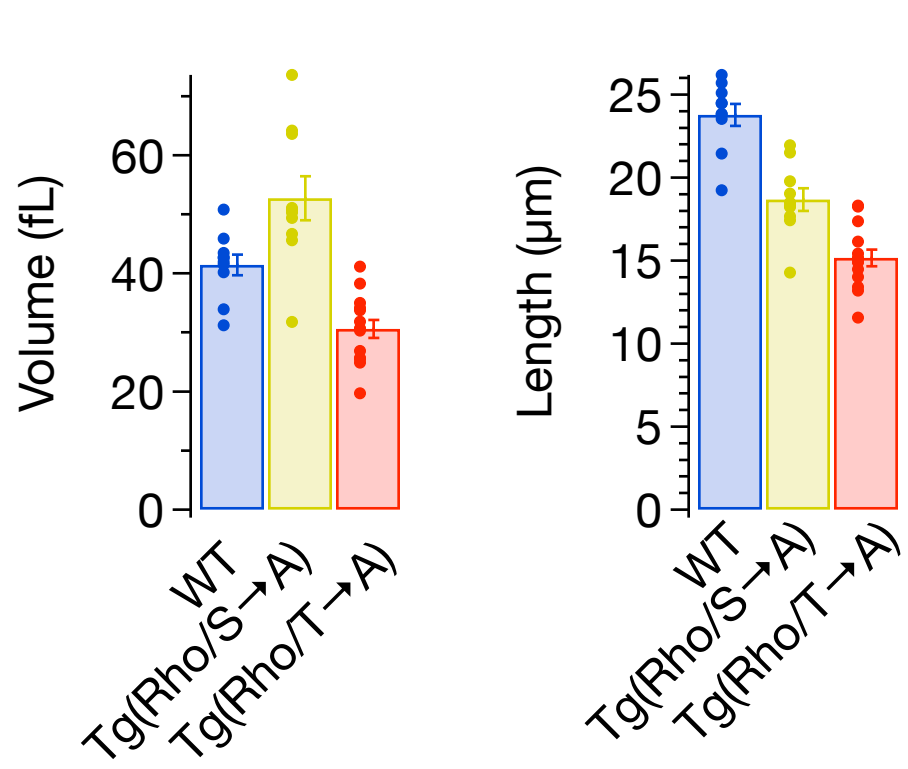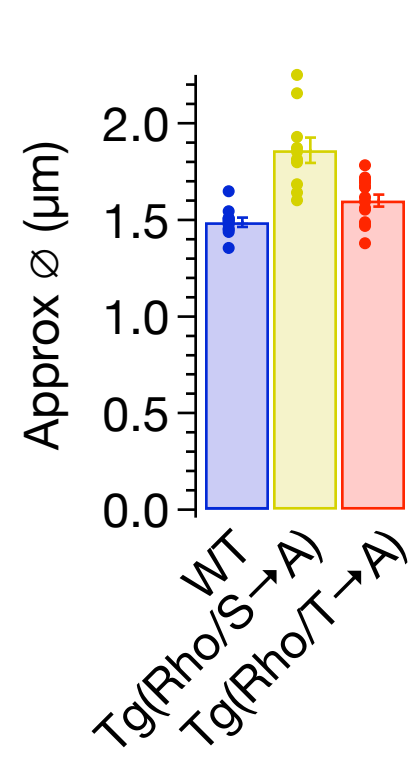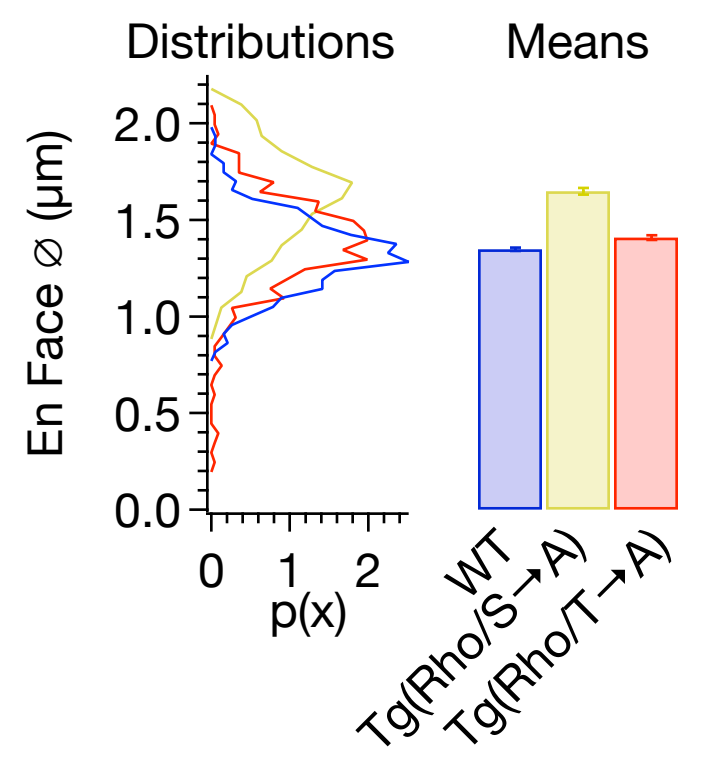

Supplement: supp [file elife-05981-supp-v1.zip]

**A**

Aligned to End (1s bins)

Normalized Responses

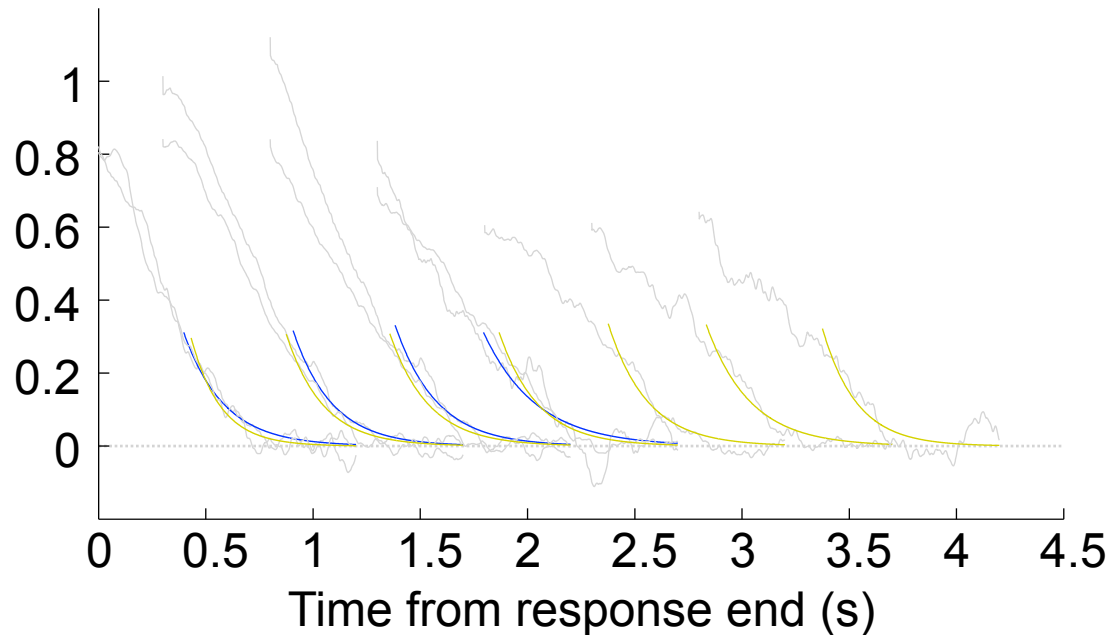**B**

End-aligned

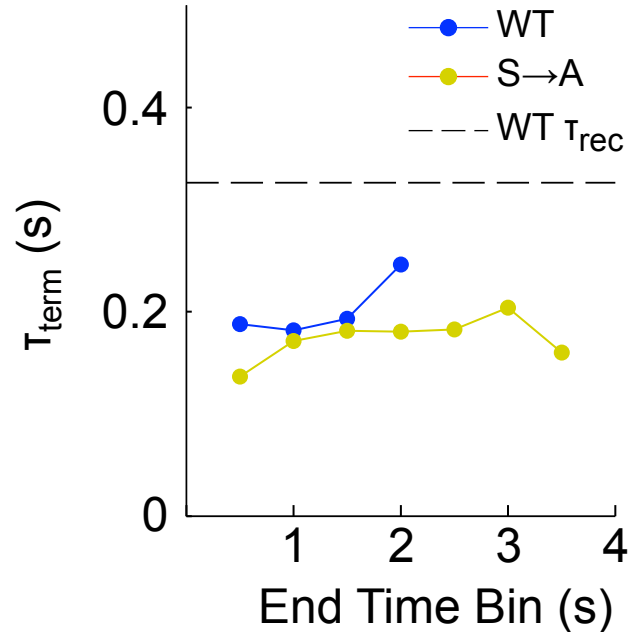

Supplement: supp [file elife-05981-supp-v1.zip]

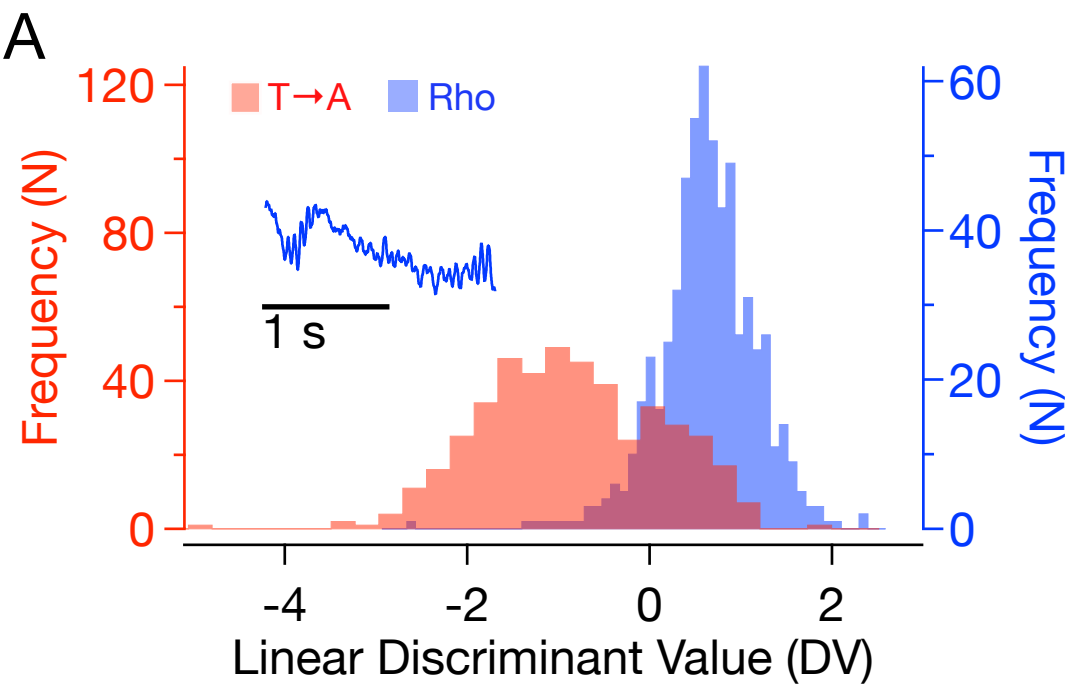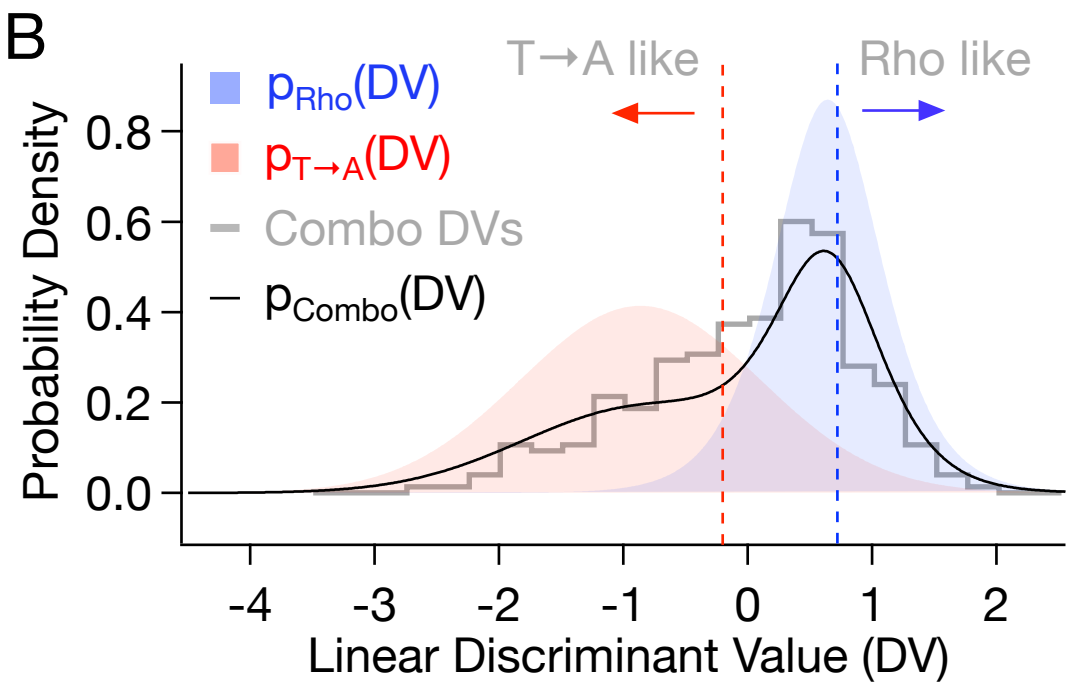

Supplement: supp [file elife-05981-supp-v1.zip]

**A**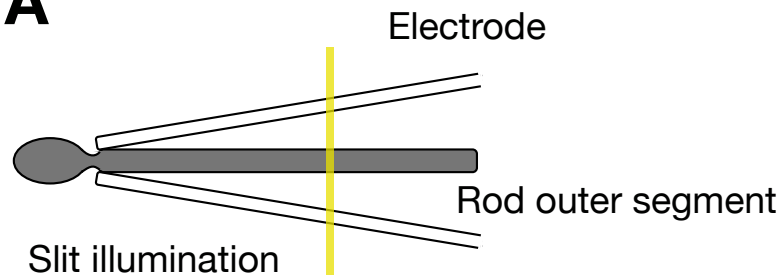

Electrical recording

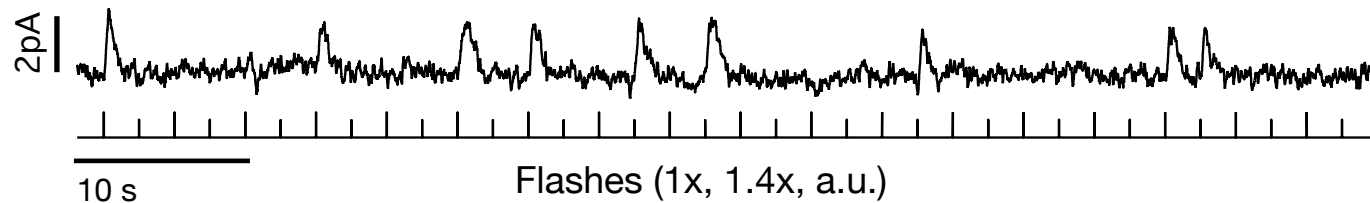**B**

Reject ← → Include

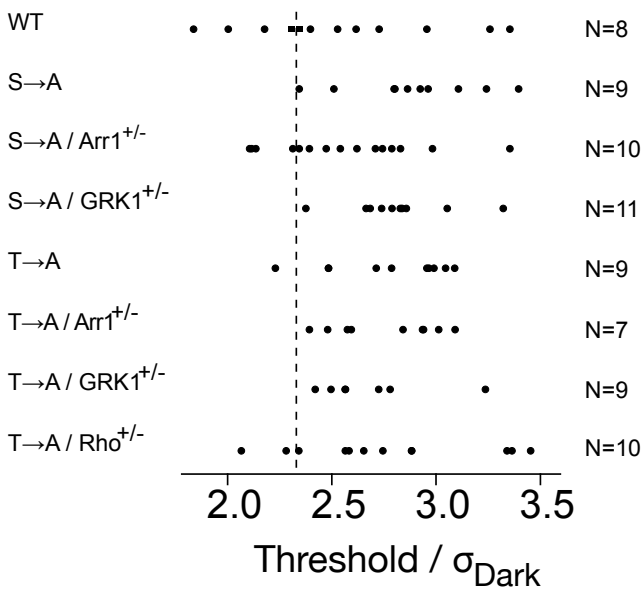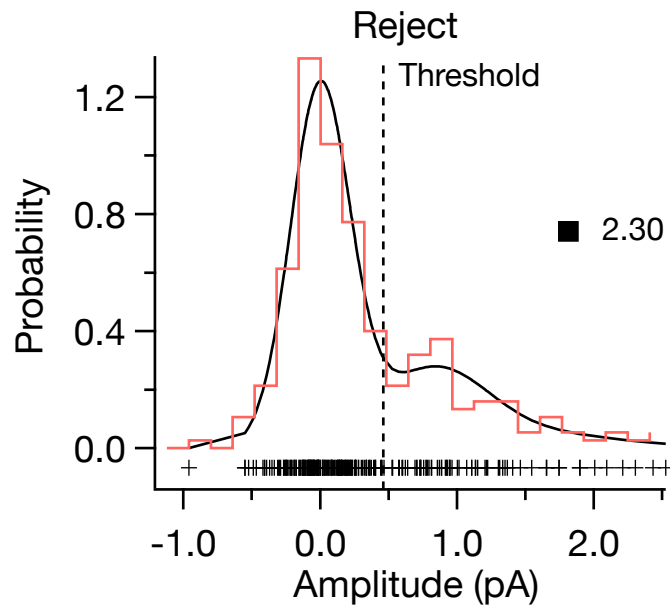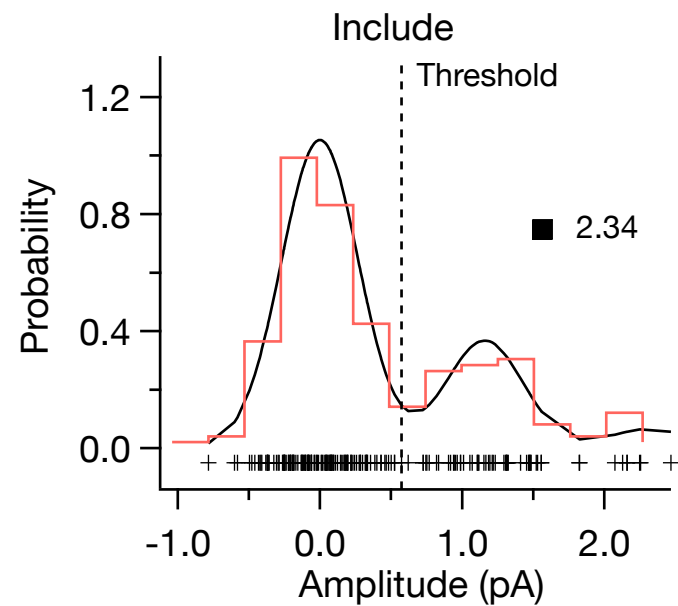

Supplement: supp [file elife-05981-supp-v1.zip]
